# Supplementary material for: Predicting the recurrence risk of pancreatic neuroendocrine neoplasms after radical resection using deep learning radiomics with preoperative computed tomography images
Source: PubMed Central journal article supplement — Ann Transl Med. 2021 May;9(10):833. doi: 10.21037/atm-21-25 (PMC8184461; doi:10.21037/atm-21-25), 2021-05
Supplement: atm-09-10-833-dss.pdf [file atm-09-10-833-dss.pdf]

## Data Sharing Statement

|                     |                                                                                                                                                     |                                                                                                                                             |
|---------------------|-----------------------------------------------------------------------------------------------------------------------------------------------------|---------------------------------------------------------------------------------------------------------------------------------------------|
| <b>Article Info</b> | http://dx.doi.org/10.21037/atm-21-25                                                                                                                |                                                                                                                                             |
| <b>Item</b>         | <b>Question</b>                                                                                                                                     | <b>Authors' Response<br/>(place "-" if not applicable)</b>                                                                                  |
| 1                   | Would you like to share data collected for your study to others?                                                                                    | Yes                                                                                                                                         |
| 2                   | If not, would you like to share the reason for your decision?                                                                                       | -                                                                                                                                           |
| 3                   | What data in particular will be shared?                                                                                                             | The CT image and postoperative survival data will be shared.                                                                                |
| 4                   | Any other documents will be shared? Such as study protocol, statistical analysis plan, informed consent form, clinical study report, analytic code. | Analytic code be shared if requested.                                                                                                       |
| 5                   | When will data availability begin?                                                                                                                  | From the publication date.                                                                                                                  |
| 6                   | When will data availability end?                                                                                                                    | One year within the publication date.                                                                                                       |
| 7                   | To whom will you share the data?                                                                                                                    | Radiologists working on neuroendocrine neoplasms.                                                                                           |
| 8                   | For what type of analysis or purpose?                                                                                                               | Model building for predicting recurrence risk.                                                                                              |
| 9                   | How or where can the data/documents be obtained?                                                                                                    | Emails could be sent to the address below to obtain the shared data: <a href="mailto:fengsht@mail.sysu.edu.cn">fengsht@mail.sysu.edu.cn</a> |
| 10                  | Any other restrictions?                                                                                                                             | -                                                                                                                                           |
